# Supplementary material for: A new pH sensor localized in the Golgi apparatus of Saccharomyces cerevisiae reveals unexpected roles of Vph1p and Stv1p isoforms
Source: PubMed Central journal article supplement (PMC7002768; doi:10.1038/s41598-020-58795-w), 2020-02-05

Figure 2 (A)

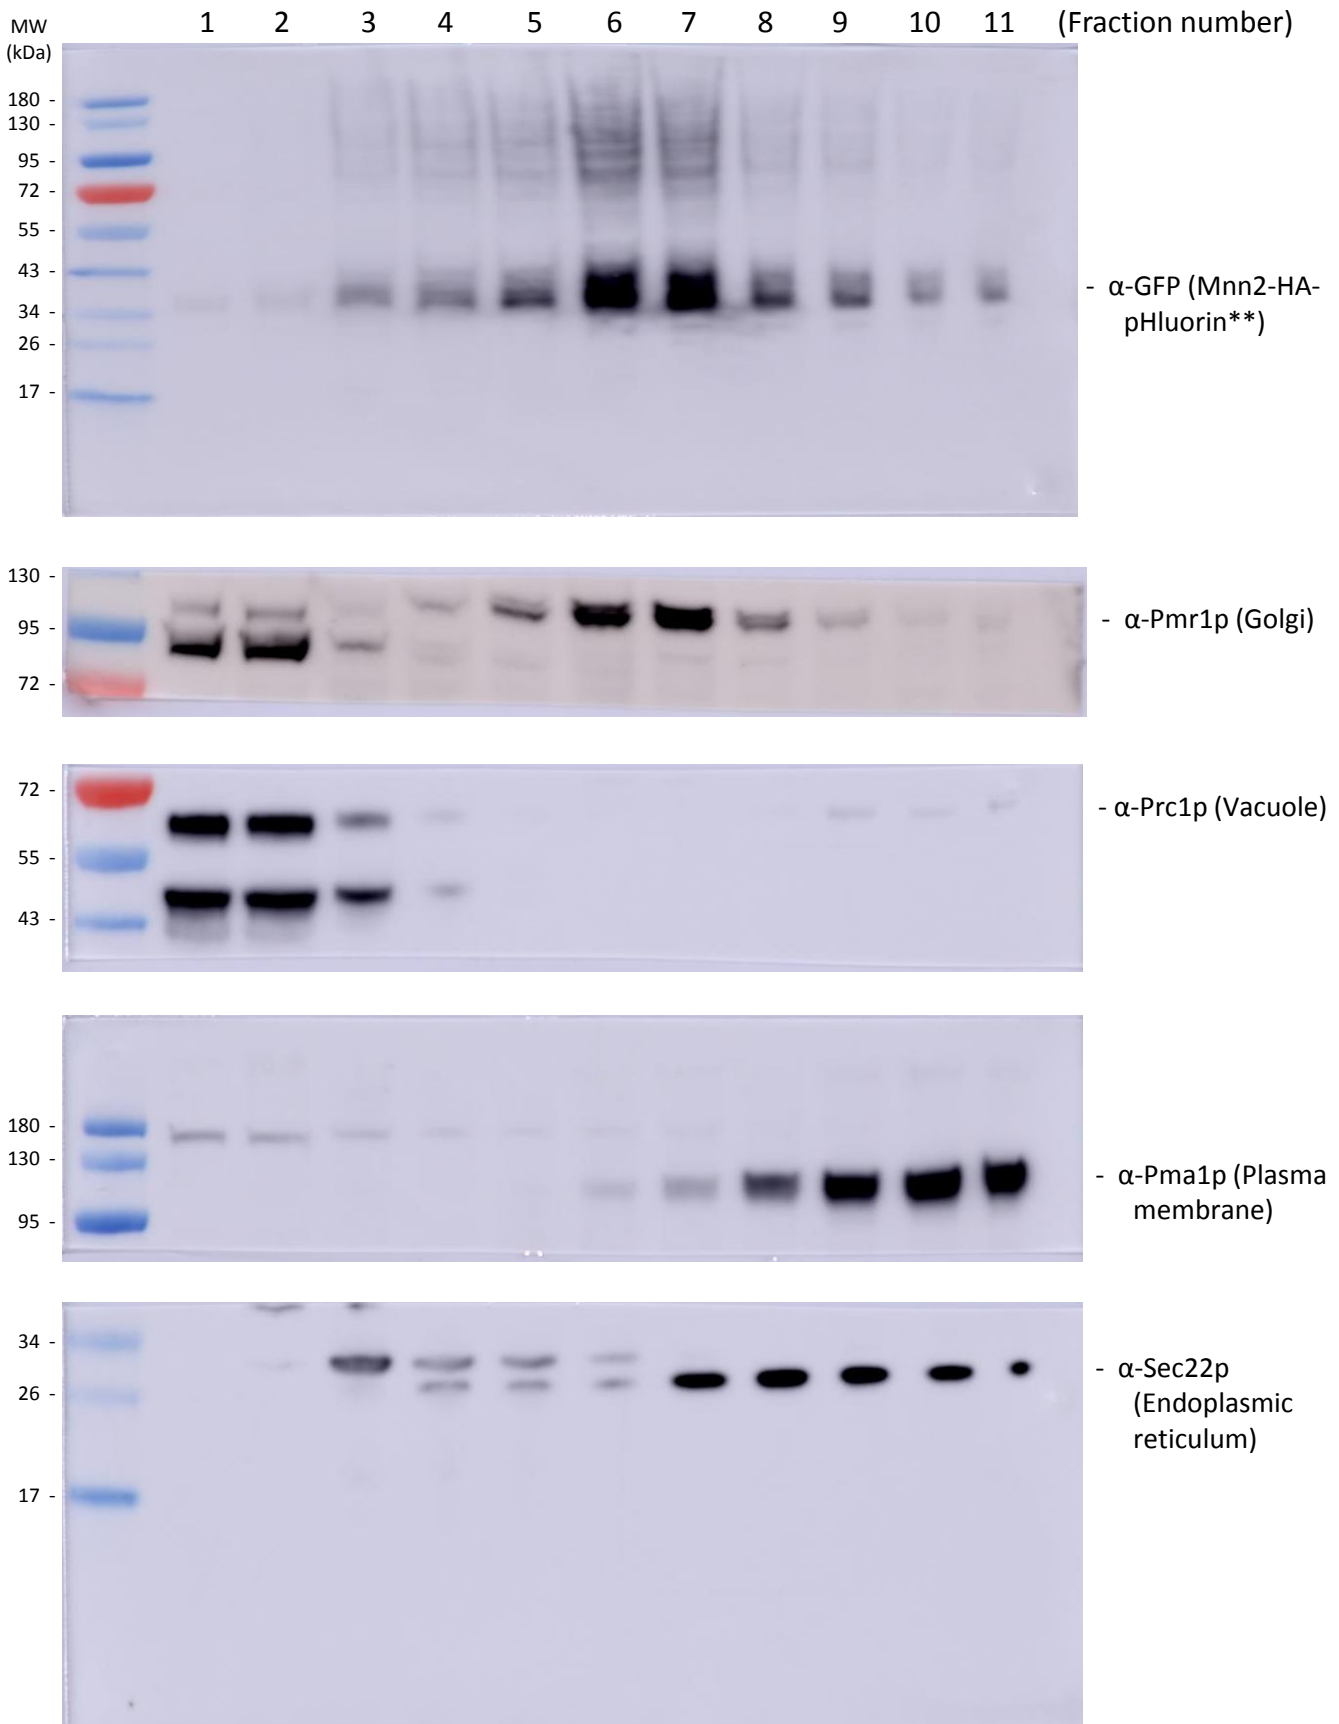

Figure 2 (C)

|                     |   |   |   |   |
|---------------------|---|---|---|---|
| Golgi fraction      | + | + | + | + |
| Proteinase K        | - | + | + | + |
| Triton X-100        | - | - | + | + |
| Protease inhibitors | - | - | - | + |

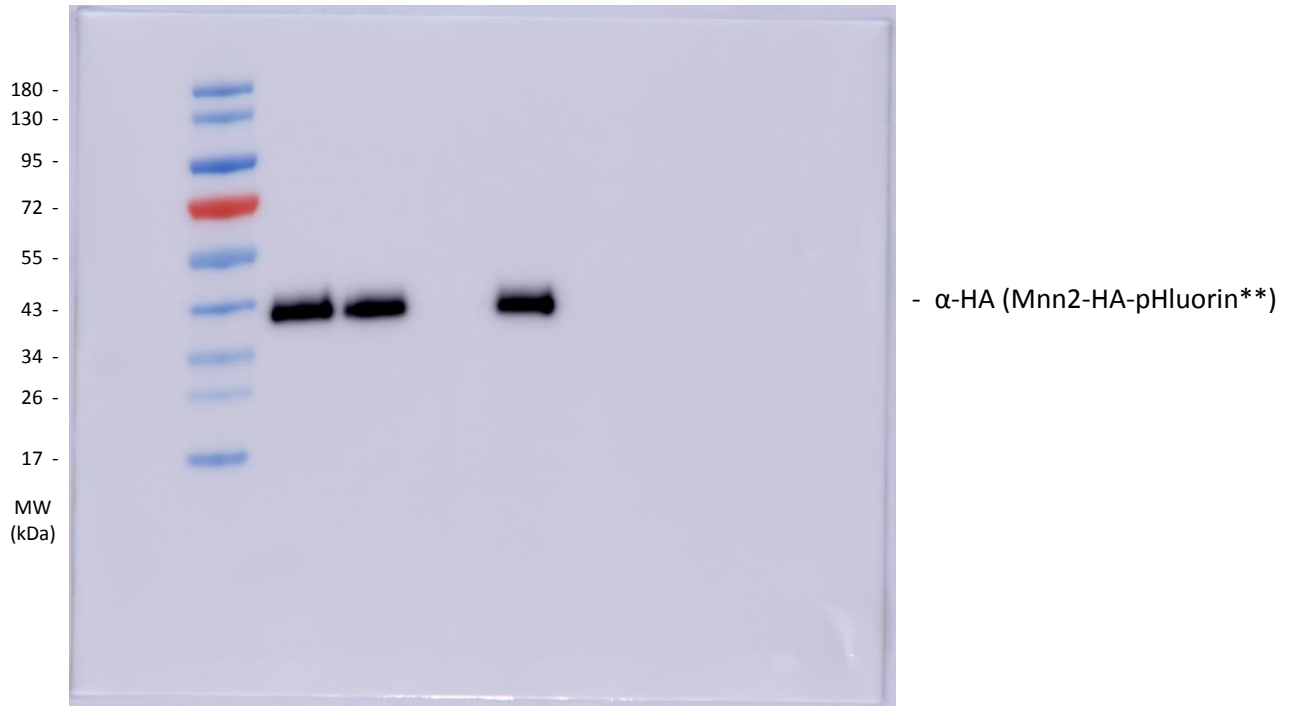

Supplement: 41598_2020_58795_MOESM1_ESM.pdf [file 41598_2020_58795_MOESM1_ESM.pdf]
